# Supplementary material
Source: publisher figshare collection journal article supplement (https://karger.figshare.com/articles/dataset/_/8222495)
Supplement: Supplementary file 1 [file 1]

**Online Suppl. Video**

Usefulness of selective occlusion of one intrahepatic duct to assist the passage of a second guidewire to the opposite intrahepatic duct.
